# Supplementary material for: Ser9p-GSK3β Modulation Contributes to the Protective Effects of Vitamin C in Neuroinflammation
Source: MDPI journal article supplement (doi:10.3390/nu16081121), 2024-04-10
Supplement: s1 [file s1]

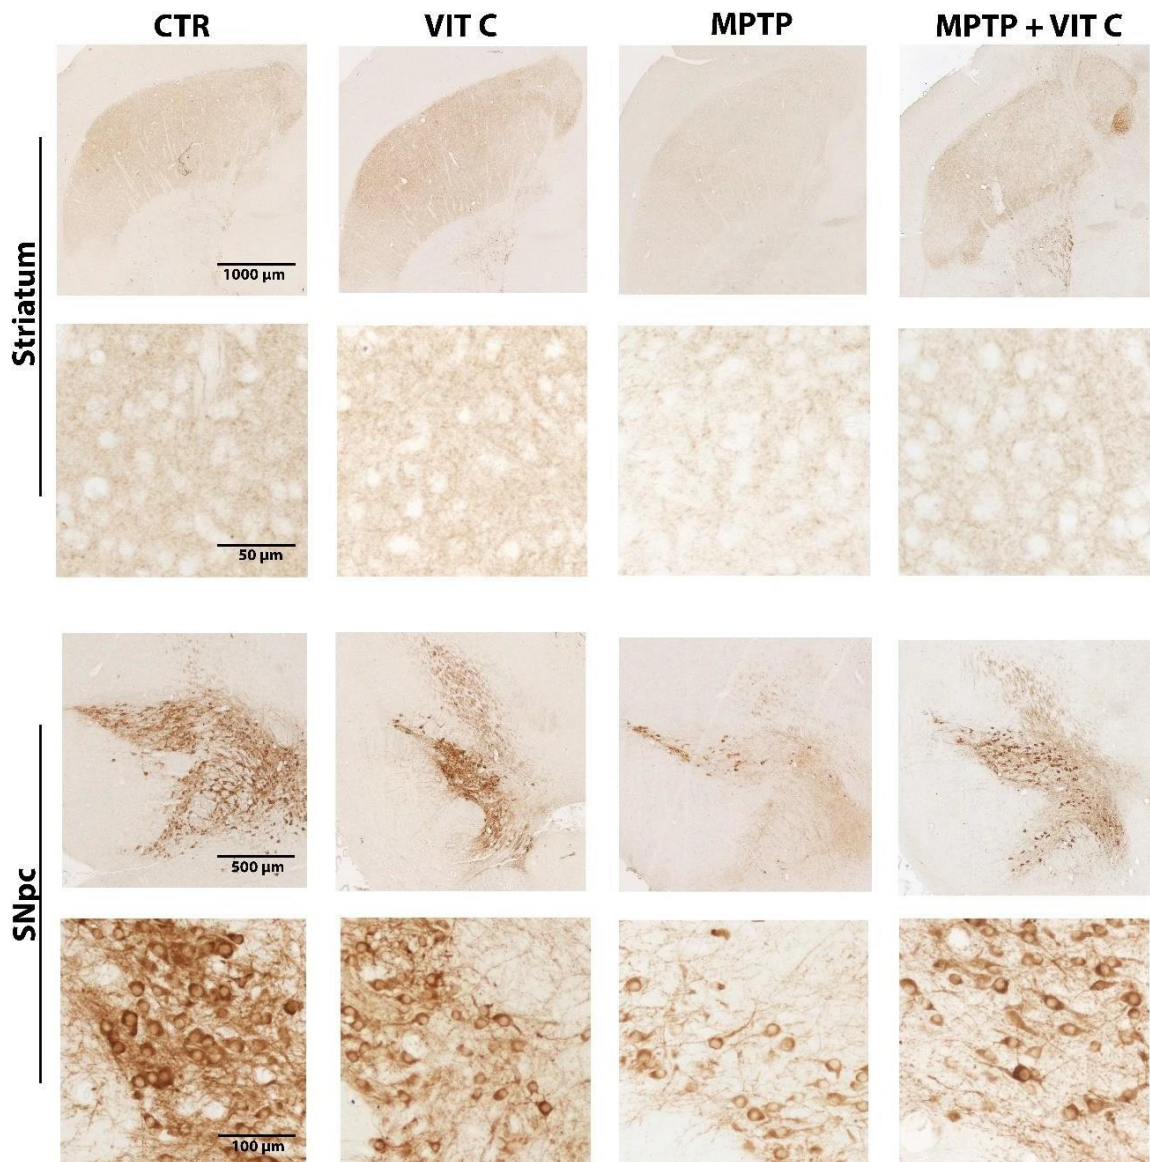

### Supplementary figure S1

Tyrosine hydroxylase (TH) analysis. (A) TH immunoreactive catecholaminergic neurons of SNpc and their projections in the striatum (upper) and SNpc (lower) in controls (CTR), mice treated with Vitamin C (VIT C), MPTP, MPTP and Vitamin C (MPTP+ VIT C). Scale bar: (striatum) upper 1000 μm (objective 4×), lower 50 μm (obj. 40×); (SNpc) upper 500 μm (obj. 4×), lower 100 μm (obj. 20×).
